# Supplementary material
Source: HighWire-hosted journal article supplement (http://rc.rcjournal.com/highwire/filestream/26469/field_highwire_adjunct_files/4/Table_S4_Supplemental_Digital_Content.docx)
Supplement: Table_S4_Supplemental_Digital_Content.docx [file Table_S4_Supplemental_Digital_Content.docx]

**Table S4. Measuring Methods to Detect Adverse Events Related to Prone Positioning**

| **Measuring methods** | **Adverse events detected** |
| --- | --- |
| Physical examination | - Meralgia paresthetica - Skin injury or pressure sore - Peripheral nerve injury - Facial edema |
| Neurological examination | - Meralgia paresthetica - Lower cranial nerves paralysis |
| Pressure Ulcer Advisory Panel score | - Skin injury or pressure sore |
| Braden score | - Skin injury or pressure sore |
| Electromyography and nerve conduction studies | - Peripheral nerve injury - Meralgia paresthetica |
| Magnetic resonance neurography | - Peripheral nerve injury |
| B-mode ultrasonography | - Peripheral nerve injury |
| Seddon classification of axonotmesis | - Peripheral nerve injury |
| Dermatologic examination | - Skin injury or pressure sore |
| Thorax computerized tomography scan | - Pneumothorax |
| Tonometry-guided intraocular pressure measurement | - Intraocular pressure increase |
| Fundoscopic examination | - Optic neuropathy |
| X-ray | - Ventilator-associated pneumonia |
| Bronchoalveolar lavage | - Ventilator-associated pneumonia |
